# Supplementary material
Source: PubMed Central journal article supplement (PMC7957959)
Supplement: NIHMS1617721-supplement-Supplementary_Material.pdf [file NIHMS1617721-supplement-Supplementary_Material.pdf]

## SUPPLEMENTARY DATA

### Contents

#### Tables

Table S1. Criteria used for adjudication of clinically significant bleeding events in the ASPREE trial. A bleeding event had to fulfil criteria in both categories A and B to be adjudicated as a confirmed event.

Table S2. Participant characteristics in aspirin and placebo arms.

Table S3. Predicted 5 year risk of upper gastrointestinal bleeding for a 70 and 80 year old person on placebo or aspirin and additional risk factors

Table S4. Predicted 5 year risk of lower gastrointestinal bleeding for a 70 and 80 year old person with aspirin and additional risk factors

Table S5. Absolute risk of overall gastrointestinal bleeding over 1 year for people on placebo or aspirin, according to age and risk factors

#### Figures

Figure S1. CONSORT flow diagram

Figure S2. Incidence of upper and lower gastrointestinal bleeding according to subgroup and treatment arm.

Figure S3. Multivariable model of risk factors for upper gastrointestinal bleeding (HR and 95% CI).

Figure S4. Multivariable model of risk factors for lower gastrointestinal bleeding (HR and 95% CI).

Figure S5. Predicted absolute 5 year bleeding risk for upper and lower gastrointestinal (GIT) bleeding according to age and risk factors.

**Table S1. Criteria used for adjudication of clinically significant bleeding events in the ASPREE trial. A bleeding event had to fulfil criteria in both categories A and B to be adjudicated as a confirmed event.**

| <b>A.</b> | <b>Criteria for substantiated bleeding</b>          | <b>Example</b>                      |
|-----------|-----------------------------------------------------|-------------------------------------|
|           | Observed bleeding                                   | Bleeding observed in ED or hospital |
|           | Reasonable report of bleeding symptoms              | Description of rectal bleeding      |
|           | Medical, nursing or paramedical report              | Medical doctor's confirmatory notes |
|           | Imaging evidence                                    | CT showing subdural bleed           |
| <b>B.</b> | <b>Criteria for clinically significant bleeding</b> | <b>Notes</b>                        |
|           | Hospitalisation for bleeding                        | Hospitalisation >24 hours           |
|           | Blood transfusion required due to bleeding          |                                     |
|           | Bleeding requiring surgery for haemostasis          |                                     |
|           | Fatal bleeding                                      |                                     |

Where adjudication needed further guidance, the following decision rules were used:

1. If hospitalisation criterion is to be utilised, bleeding must be the principal reason for hospitalisation, prolongation of hospitalisation or surgery.
2. A positive faecal occult blood test, anaemia, or haemoglobin drop alone without overt bleeding is insufficient to substantiate bleeding.
3. Additional adjudication will occur on whether intracranial bleeding was spontaneous (non-traumatic) or induced (traumatic).
4. Elective inpatient surgical procedure (includes therapeutic endoscopic procedures) with prolonged stay, repeat surgery, or transfusion do NOT meet criteria
5. Elective inpatient surgical (includes therapeutic endoscopic procedures) readmitted after discharge primarily for bleeding: Does meet criteria
6. Elective outpatient procedure (includes therapeutic endoscopic procedures) admitted primarily for bleeding: Does meet criteria
7. Non-elective inpatient procedure (includes therapeutic endoscopic procedures) readmitted, prolonged stay, repeat surgery, or transfused: Does meet criteria

**Table S2. Participant characteristics in aspirin and placebo arms.**

|                                            | <b>Placebo (n=9589)</b> | <b>Aspirin (n=9525)</b> |
|--------------------------------------------|-------------------------|-------------------------|
| <b>Female sex</b>                          | 5410 (56%)              | 5373 (56%)              |
| <b>Age ≥ 74 years</b>                      | 4766 (50%)              | 4806 (50%)              |
| <b>Ethnicity- Caucasian</b>                |                         |                         |
| <b>Ethnicity-African American</b>          | 450 (5%)                | 451 (5%)                |
|                                            |                         |                         |
| <b>Smoking</b>                             |                         |                         |
| <i>Never</i>                               | 5316 (55%)              | 5264 (55%)              |
| <i>Former</i>                              | 3890 (41%)              | 3909 (41%)              |
| <i>Current</i>                             | 383 (4%)                | 352 (4%)                |
| <b>Alcohol- current consumption</b>        | 7333 (76.5)             | 7309 (76.7)             |
| <b>Waist circumference (median, cm,SD)</b> | 97.2 (12.8)             | 97.1 (13)               |
| <b>Obesity</b>                             | 2857 (30%)              | 2820 (30%)              |
| <b>Hypertension</b>                        | 7148 (75%)              | 7065 (74%)              |
| <b>Diabetes</b>                            | 1030 (11%)              | 1027 (11%)              |
| <b>Chronic kidney disease</b>              | 2464 (26%)              | 2456 (26%)              |
| <b>Previous regular aspirin use</b>        | 1041 (11%)              | 1053 (11%)              |
| <b>Regular PPI use</b>                     | 2374 (25%)              | 2340 (25%)              |
| <b>Regular NSAID use</b>                   | 1342 (14%)              | 1371 (14%)              |

**Table S3. Predicted 5 year risk of upper gastrointestinal bleeding for a 70 and 80 year old person on placebo or aspirin and additional risk factors**

| Additional risk factors         | 70 year old             |                         | 80 year old             |                          |
|---------------------------------|-------------------------|-------------------------|-------------------------|--------------------------|
|                                 | Placebo                 | Aspirin                 | Placebo                 | Aspirin                  |
| <b>None</b>                     | 0.22%<br>(0.14 – 0.33%) | 0.40%<br>(0.26 – 0.59%) | 0.52%<br>(0.36 – 0.75%) | 0.97%<br>(0.68 – 1.35%)  |
| <b>Smoking</b>                  | 0.52%<br>(0.23 – 1.05%) | 0.95%<br>(0.43 – 1.87%) | 1.24%<br>(0.54 – 2.49%) | 2.28%<br>(1.04 – 4.37%)  |
| <b>CKD</b>                      | 0.32%<br>(0.19 – 0.52%) | 0.60%<br>(0.37 – 0.92%) | 0.78%<br>(0.51 – 1.15%) | 1.44%<br>(1.01 – 2.00%)  |
| <b>NSAID use</b>                | 0.37%<br>(0.21 – 0.63%) | 0.69%<br>(0.38 – 1.17%) | 0.90%<br>(0.53 – 1.46%) | 1.67%<br>(0.96 – 2.71%)  |
| <b>Smoking &amp; NSAID</b>      | 0.89%<br>(0.38 – 1.82%) | 1.64%<br>(0.71 – 3.27%) | 2.13%<br>(0.90 – 4.28%) | 3.91%<br>(1.69 – 7.61%)  |
| <b>Smoking &amp; CKD</b>        | 0.77%<br>(0.30 – 1.68%) | 1.42%<br>(0.59 – 2.95%) | 1.83%<br>(0.74 – 3.85%) | 3.37%<br>(1.44 – 6.67%)  |
| <b>Smoking, CKD &amp; NSAID</b> | 1.32%<br>(0.52 – 2.85%) | 2.43%<br>(0.98 – 5.05%) | 3.15%<br>(1.26 – 6.50%) | 5.76%<br>(2.38 – 11.32%) |

**Table S4. Predicted 5 year risk of lower gastrointestinal bleeding for a 70 and 80 year old person with aspirin and additional risk factors**

| Additional risk factors                | 70 year old           |                         | 80 year old           |                       |
|----------------------------------------|-----------------------|-------------------------|-----------------------|-----------------------|
|                                        | Placebo               | Aspirin                 | Placebo               | Aspirin               |
| <b>None</b>                            | 0.16%<br>(0.09-0.28%) | 0.22%<br>(0.13-0.37%)   | 0.37%<br>(0.20-0.64%) | 0.50%<br>(0.28-0.83%) |
| <b>Smoking</b>                         | 0.25%<br>(0.14-0.42%) | 0.34%<br>(0.18-0.58%)   | 0.56%<br>(0.30-0.97%) | 0.76%<br>(0.41-1.30%) |
| <b>CKD</b>                             | 0.23%<br>(0.11-0.45%) | 0.31%<br>(0.15 – 0.61%) | 0.52%<br>(0.26-0.97%) | 0.70%<br>(0.35-1.29%) |
| <b>Hypertension</b>                    | 0.32%<br>(0.21-0.49%) | 0.44%<br>(0.29 – 0.65%) | 0.73%<br>(0.47-1.09%) | 0.99%<br>(0.70-1.36%) |
| <b>Smoking &amp; Hypertension</b>      | 0.49%<br>(0.31-0.74%) | 0.66%<br>(0.42 – 1.01%) | 1.10%<br>(0.72-1.62%) | 1.49%<br>(1.00-2.13%) |
| <b>Smoking &amp;CKD</b>                | 0.35%<br>(0.17-0.66%) | 0.47%<br>(0.22-0.92%)   | 0.79%<br>(0.40-1.41%) | 1.06%<br>(0.54-1.92%) |
| <b>Smoking, Hypertension &amp; CKD</b> | 0.69%<br>(0.42-1.09%) | 0.93%<br>(0.54– 1.51%)  | 1.55%<br>(1.07-2.17%) | 2.09%<br>(1.45-2.91%) |

**Table S5. Absolute risk of overall gastrointestinal bleeding over 1 year for people on placebo or aspirin, according to age and risk factors.**

| Additional risk factors                   | 70 year old            |                       | 80 year old            |                       |
|-------------------------------------------|------------------------|-----------------------|------------------------|-----------------------|
|                                           | Placebo                | Aspirin               | Placebo                | Aspirin               |
| Nil                                       | 0.05%<br>(0.03-0.08%)  | 0.08%<br>(0.05-0.13%) | 0.12%<br>(0.07-0.19%)  | 0.19%<br>(0.12-0.3%)  |
| Smoking                                   | 0.11%<br>(0.05-0.21%)  | 0.17%<br>(0.08-0.34%) | 0.25%<br>(0.12-0.5%)   | 0.41%<br>(0.19-0.8%)  |
| CKD#                                      | 0.07%<br>(0.04-0.12%)  | 0.12%<br>(0.07-0.2%)  | 0.17%<br>(0.1-0.28%)   | 0.27%<br>(0.16-0.44%) |
| Hypertension                              | 0.07%<br>(0.05-0.12%)  | 0.12%<br>(0.07-0.19%) | 0.18%<br>(0.11-0.26%)  | 0.28%<br>(0.19-0.42%) |
| At risk WC*                               | 0.07%<br>(0.04-0.1%)   | 0.11%<br>(0.07-0.17%) | 0.16%<br>(0.1-0.25%)   | 0.25%<br>(0.15-0.4%)  |
| Smoking & at risk WC                      | 0.14%<br>(0.07-0.28%)  | 0.23%<br>(0.11-0.45%) | 0.34%<br>(0.15-0.67%)  | 0.54%<br>(0.24-1.07%) |
| Smoking & CKD                             | 0.15%<br>(0.07-0.32%)  | 0.25%<br>(0.11-0.51%) | 0.36%<br>(0.16-0.74%)  | 0.58%<br>(0.26-1.18%) |
| CKD, hypertension, at risk WC             | 0.14%<br>(0.09-0.22%)  | 0.23%<br>(0.14-0.36%) | 0.33%<br>(0.22-0.5%)   | 0.54%<br>(0.35-0.8%)  |
| Smoking, CKD & at risk WC                 | 0.20 %<br>(0.09-0.42%) | 0.33%<br>(0.14-0.68%) | 0.48%<br>(0.21-0.99%)  | 0.77%<br>(0.33-1.59%) |
| Smoking, hypertension and at risk WC      | 0.21%<br>(0.11-0.39%)  | 0.34%<br>(0.17-0.62%) | 0.50 %<br>(0.25-0.91%) | 0.80%<br>(0.4-1.45%)  |
| Smoking, CKD, at risk WC and hypertension | 0.30%<br>(0.15-0.58%)  | 0.49%<br>(0.23-0.93%) | 0.71%<br>(0.35-1.33%)  | 1.14%<br>(0.55-2.12%) |

\*WC= waist circumference; # CKD=chronic kidney disease

Figure S1. Consort flow diagram.

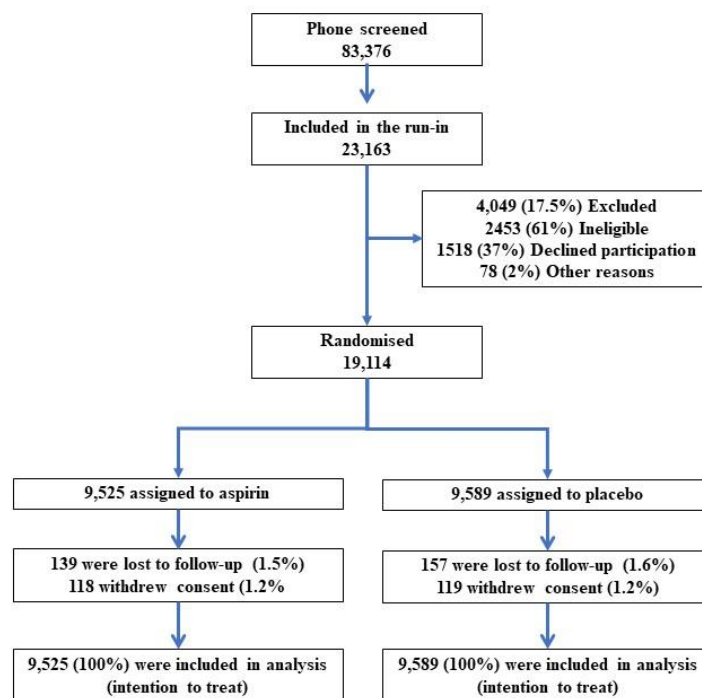

**Figure S2. Incidence of upper and lower gastrointestinal bleeding according to subgroup and treatment arm.**

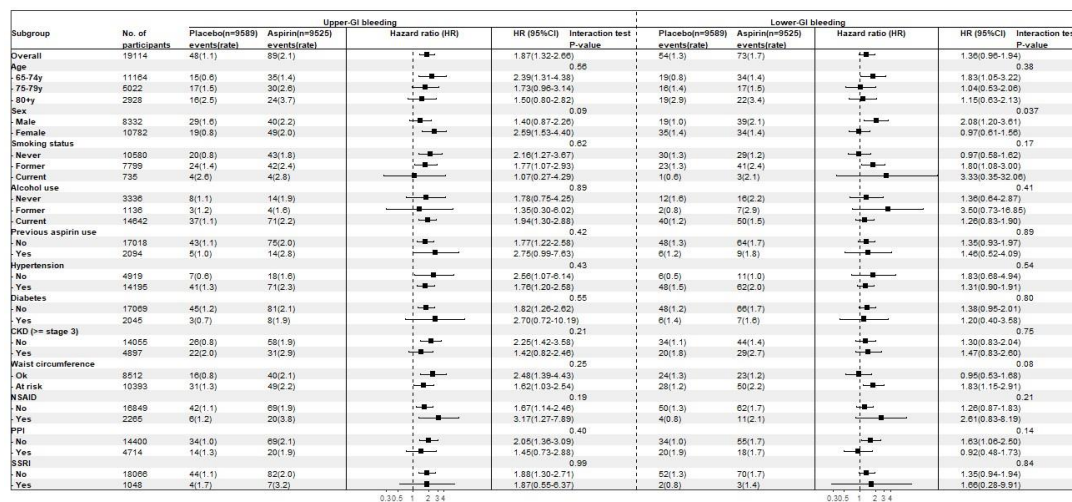

Footnote: Diabetes = self-report of diabetes mellitus or fasting glucose  $\geq 126$  mg/dL ( $\geq 7$  mmol/L) or on treatment for diabetes. Hypertension = Systolic blood pressure  $\geq 140$  mmHg or Diastolic blood pressure  $\geq 90$  mmHg or on treatment for high blood pressure. CKD= Chronic kidney disease = eGFR  $< 60$  ml/min/1.73m<sup>2</sup> or albumin to creatinine ratio  $\geq 3$ mg/mmol.



**Figure S3. Multivariable model of risk factors for upper gastrointestinal bleeding (HR and 95% CI).**

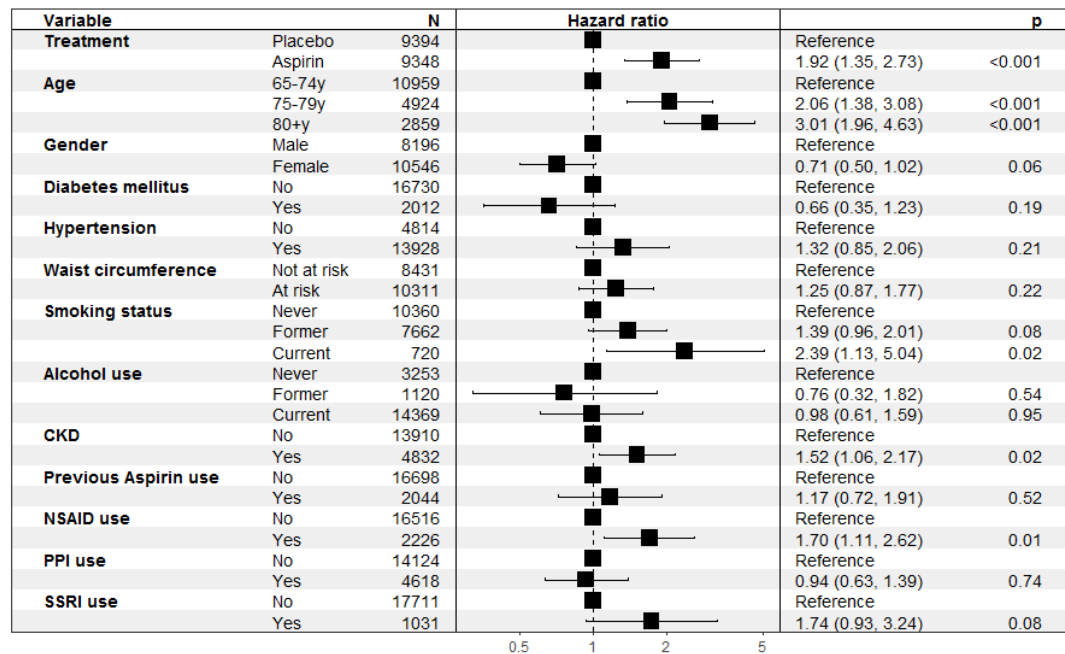

Footnote: Diabetes = self-report of diabetes mellitus or fasting glucose  $\geq 126$  mg/dL ( $\geq 7$  mmol/L) or on treatment for diabetes. Hypertension = Systolic blood pressure  $\geq 140$  mmHg or Diastolic blood pressure  $\geq 90$  mmHg or on treatment for high blood pressure. CKD= Chronic kidney disease = eGFR  $< 60$  ml/min/1.73m<sup>2</sup> or albumin to creatinine ratio  $\geq 3$ mg/mmol.

**Figure S4. Multivariable model of risk factors for lower gastrointestinal bleeding (HR and 95% CI).**

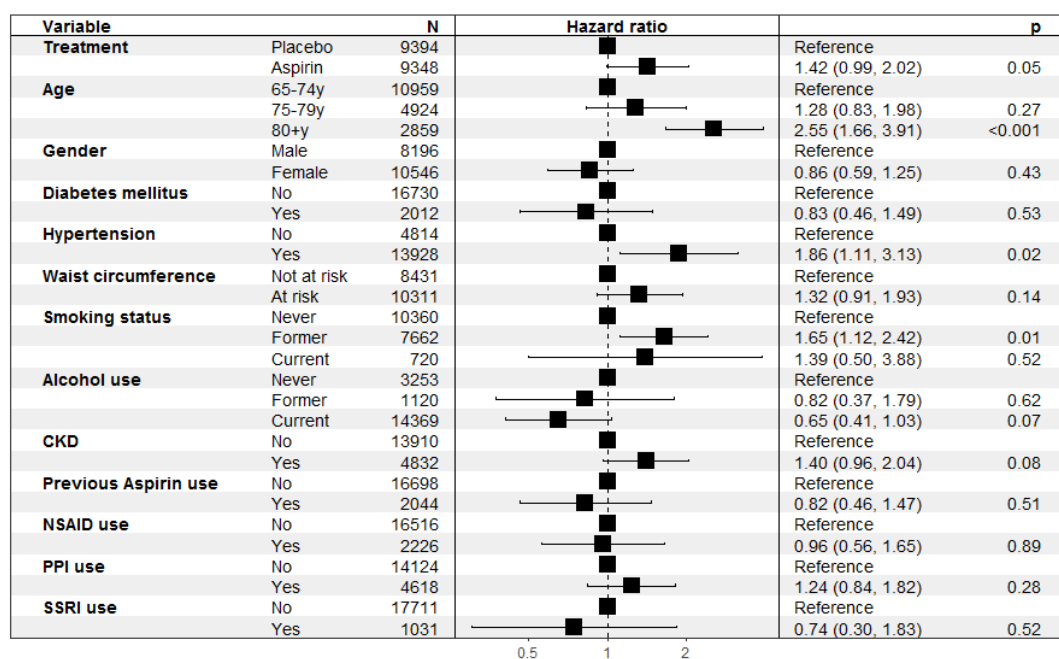

*Footnote: Diabetes = self-report of diabetes mellitus or fasting glucose  $\geq 126$  mg/dL ( $\geq 7$  mmol/L) or on treatment for diabetes. Hypertension = Systolic blood pressure  $\geq 140$  mmHg or Diastolic blood pressure  $\geq 90$  mmHg or on treatment for high blood pressure. CKD= Chronic kidney disease = eGFR  $< 60$  ml/min/1.73m<sup>2</sup> or albumin to creatinine ratio  $\geq 3$ mg/mmol.*

**Figure S5. Predicted absolute 5 year bleeding risk for upper and lower gastrointestinal (GIT) bleeding according to age and risk factors.**

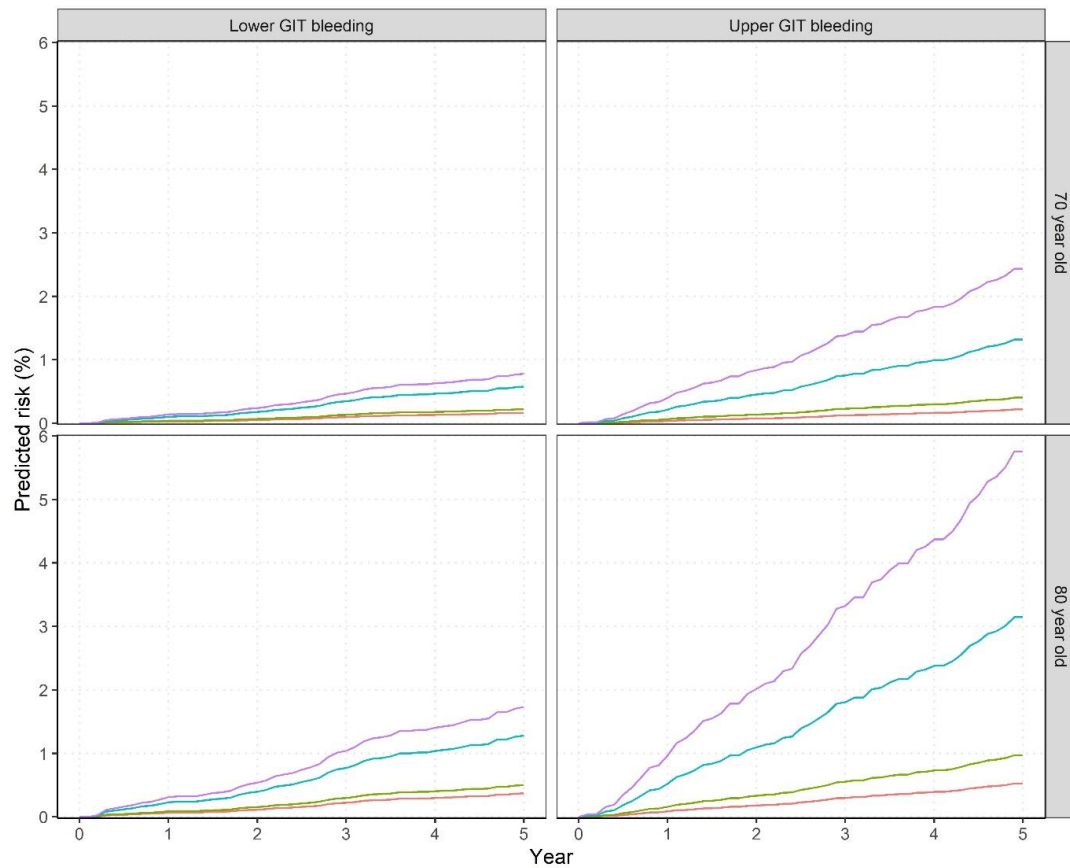

*Footnote: Red line= no risk factors, on placebo, Green line= no risk factors but on aspirin, Blue line= all risk factors and on placebo, Purple line= aspirin and all risk factors; modelled risk factors were smoking, CKD and NSAID use for upper gastrointestinal bleeding, and smoking, hypertension and CKD for lower gastrointestinal bleeding.*
